# Supplementary material for: Grafting polysiloxane onto ultrafiltration membranes to optimize surface energy and mitigate fouling
Source: Royal Society of Chemistry journal article supplement (doi:10.1039/d0sm00551g), 2020-01-01
Supplement: d0sm00551g1.pdf [file d0sm00551g1.pdf]

## Supporting Information

### **Grafting polysiloxane onto ultrafiltration membranes to optimize surface energy and mitigate fouling**

Thien Tran,<sup>1</sup> Xiaoyi Chen,<sup>1</sup> Sarthak Doshi,<sup>1</sup> Christopher M. Stafford,<sup>2</sup> and Haiqing Lin<sup>1,\*</sup>

<sup>1</sup> Department of Chemical and Biological Engineering, University at Buffalo, The State University of New York, Buffalo, NY 14260, USA.

<sup>2</sup> Materials Science and Engineering Division, National Institute of Standards and Technology, 100 Bureau Drive, Gaithersburg, MD 20899, USA.

\* Corresponding author. Email: [haiqingl@buffalo.edu](mailto:haiqingl@buffalo.edu) (H. Lin)

Table S1 summarizes the elemental compositions of the coating layers on a silicon wafer measured by XPS. Three spots were evaluated for each sample, and the mean values are reported. The uncertainty in the Si/C ratio is the standard deviation of three measurements.

**Table S1.** Elemental compositions (atomic%) of the coating layers on Si wafer determined using XPS.

| Samples   | C 1s  | O 1s  | N 1s | Si 2p | Si/C          |
|-----------|-------|-------|------|-------|---------------|
| PDA       | 72.13 | 18.29 | 7.79 | 1.78  | 0.025 ± 0.002 |
| PDA/PSi-1 | 69.71 | 17.01 | 7.55 | 5.72  | 0.082 ± 0.001 |
| PDA/PSi-2 | 65.23 | 18.67 | 5.72 | 10.38 | 0.159 ± 0.006 |

The Si/C and N/C ratio can be used to calculate the mass content of the PSi-NH<sub>2</sub> in the coating layer. Assuming there is  $n_A$  mole of PSi-NH<sub>2</sub> and  $n_B$  mole of PDA in the coating layer, the following equations can be derived:

$$\frac{Si}{C} = \frac{12n_A}{30n_A + 8n_B}$$

(S1)

$$\frac{N}{C} = \frac{2n_A + n_B}{30n_A + 8n_B}$$

(S2)

Each PSi-NH<sub>2</sub> molecule contains 10 Si, 2 N, and 30 C, and each dopamine contains 1 N and 8 C.

Figure S1 also compares the high-resolution peak of Si 2p for a bare Si wafer and those coated with PDA, PDA/PSi-1, and PDA/PSi-2. The wafer exhibits a characteristic peak of element Si (99 eV). On the other hand, all the coated samples do not exhibit the peak of 99 eV because the dense PDA layer ( $\approx 18$  nm) is thicker than the escape depth of the photoelectrons. Moreover, the PDA/PSi-1 and PDA/PSi-2 show a peak at 102 eV, characteristic to organic Si (e.g. PDMS) confirming the effective deposition of PSi-NH<sub>2</sub> on the PDA layer.<sup>1,2</sup> Interestingly, the PDA coated sample also shows a small peak at 102 eV, presumably due to contamination of the surface by PDMS.

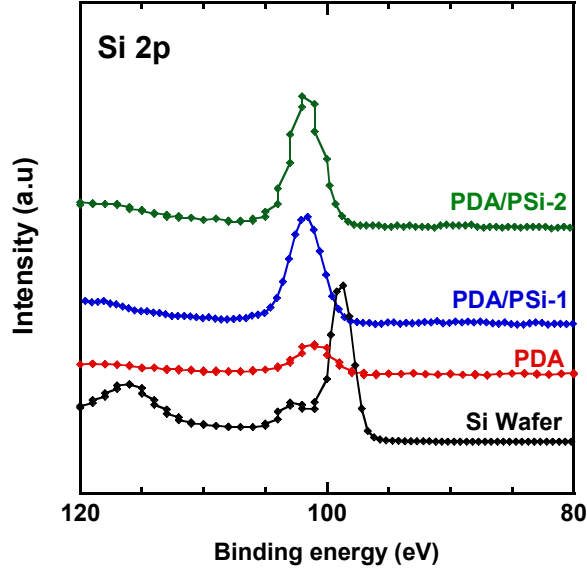

**Fig. S1** High-resolution spectra of Si 2p peak for PDA, PDA/PSi-1, and PDA/PSi-2 coating on Si wafer.

Table S2 presents the surface energy ( $\gamma$ , mN/m) along with the dispersive ( $\gamma^D$ ) and polar ( $\gamma^P$ ) component of the surface energy for three probe liquids (water, glycerol, and diiodomethane) and the membranes. The values of three probe liquids were obtained from literature, while those of membranes samples are calculated using Eqs.1 and 2 in the manuscript.

**Table S2.** Surface energies of the liquids and membranes.

| Sample                       | $\gamma$ (mN/m) | $\gamma^P$ (mN/m) | $\gamma^D$ (mN/m) |
|------------------------------|-----------------|-------------------|-------------------|
| Water <sup>3,4</sup>         | 72.8            | 51.0              | 21.8              |
| Glycerol <sup>3,4</sup>      | 63.4            | 24.6              | 38.8              |
| Diiodomethane <sup>3,4</sup> | 50.8            | 3.6               | 47.2              |
| PSf                          | 42.3            | 25.8              | 16.5              |
| PSf/PDA                      | 51.6            | 28.8              | 22.8              |
| PSf/PDA/PSi-2                | 20.4            | 10.3              | 10.1              |
| PSf/PDA/PSi-4                | 19.1            | 6.8               | 12.3              |
| PSf/PDA/PSi-6                | 17.3            | 5.1               | 12.2              |

Figure S2 presents the fouling characterization for PSf/PDA, PSf/PDA/PSi-2, PSf/PDA/PSi-4, and PSf/PDA/PSi-6 when challenged using 2 g/L sodium alginate solution. For PSf/PDA/PSi-6, the  $J_{TH}$  value cannot be determined because the TMP was above the limit of the apparatus to reach high water flux required. Interestingly, although PSf/PDA/PSi-2 and PSf/PDA/PSi-4 show lower pure water permeance than PSf/PDA (750 LMH/bar), they show  $J_C$  and  $J_{TH}$  values comparable to those of PSf/PDA. This also suggests that the PSi-NH<sub>2</sub> grafting improves the antifouling

performance because membranes with lower pure water permeance are expected to exhibit lower  $J_C$  and  $J_{TH}$  values.

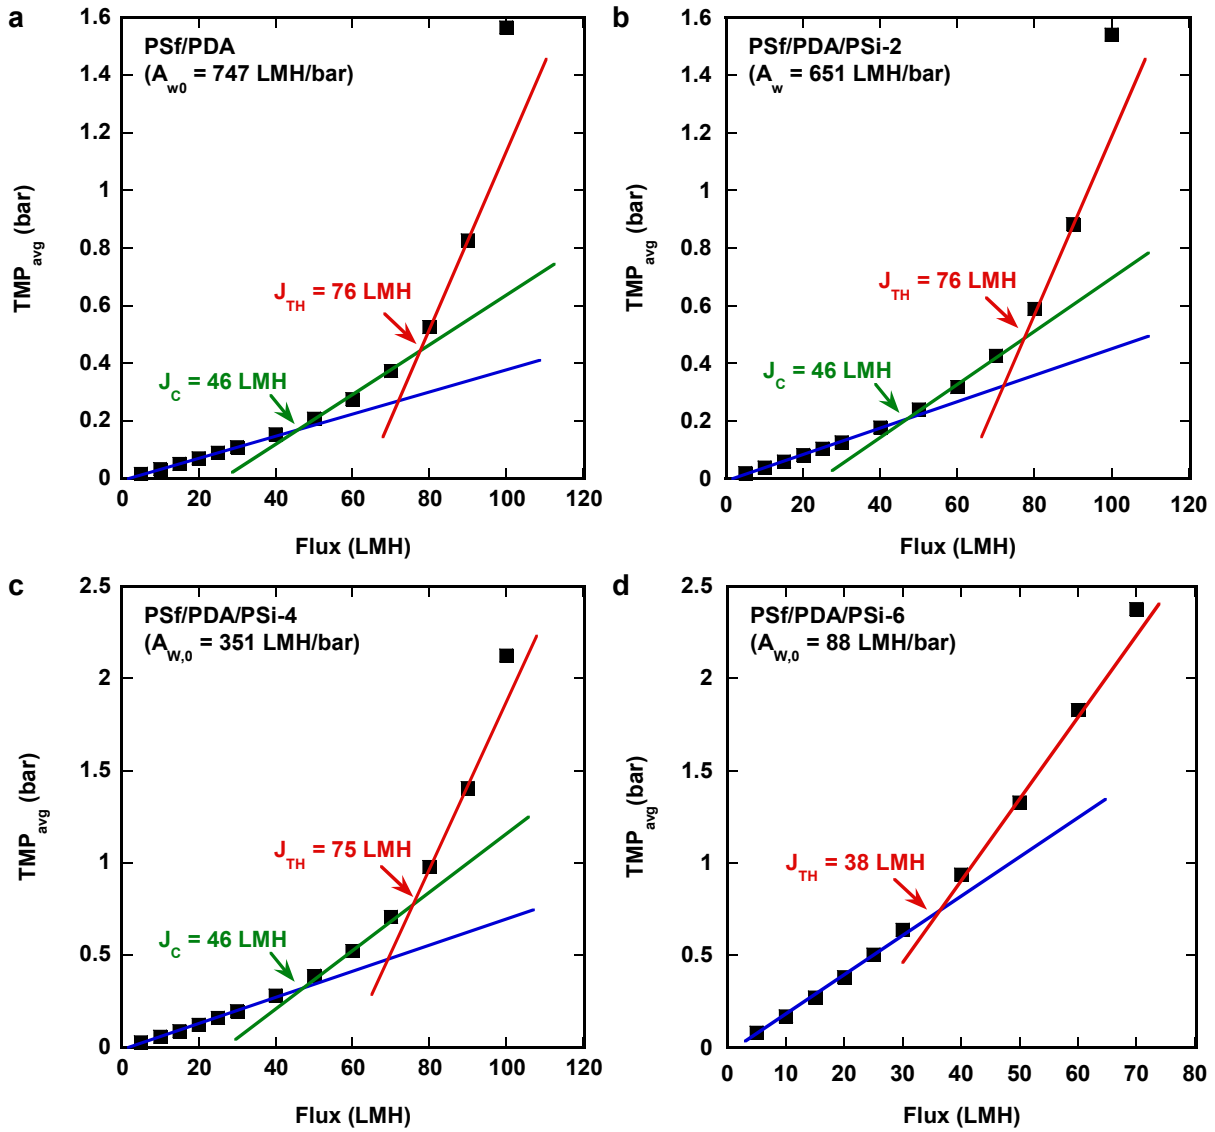

**Fig. S2**  $TMP_{avg}$  at each permeate flux for (a) PSf/PDA, (b) PSf/PDA/PSi-2, (c) PSf/PDA/PSi-4, and (d) PSf/PDA/PSi-6 when challenged with 2 g/L sodium alginate at  $\approx 23^\circ\text{C}$  with  $Re \approx 1500$  and a crossflow velocity of 0.38 m/s.

## References

1. Louette, P.; Bodino, F.; Pireaux, J. J., Poly(dimethyl siloxane) (PDMS) XPS reference core level and energy loss spectra. *Surf. Sci. Spectra* **2005**, *12* (1), 38-43.
2. Jakša, G.; Štefane, B.; Kovač, J., XPS and AFM characterization of aminosilanes with different numbers of bonding sites on a silicon wafer. *Surf. Interface anal.* **2013**, *45* (11), 1709-1713.
3. Żenkiewicz, M., Methods for the calculation of surface free energy of solids. *J. Achiev. Mater. Manuf. Eng.* **2007**, *24* (1), 137-145.

4. Ebnesajjad, S., 3. Surface energy of solids and its measurement. In *Surface Treatment of Materials for Adhesion Bonding*, 2nd ed.; Elsevier: New York, 2014; pp 29-42.
